# Supplementary material for: Ibrutinib and venetoclax as primary therapy in symptomatic, treatment-naïve Waldenström macroglobulinemia
Source: PubMed Central journal article supplement — Blood. 2023 Oct 31;143(7):582–91. doi: 10.1182/blood.2023022420 (PMC10873534; doi:10.1182/blood.2023022420), 2023-10-31
Supplement: BLOOD_BLD-2023-022420-mmc1.pdf [file BLOOD_BLD-2023-022420-mmc1.pdf]

## Supplemental data

**Table S1.** Patients' baseline characteristics per *CXCR4* nonsense vs. frameshift status

| Characteristic                              | <b>CXCR4 NS<br/>(n=10)</b> | <b>CXCR4 FS<br/>(n=7)</b> | <b>p-value</b> |
|---------------------------------------------|----------------------------|---------------------------|----------------|
| Age >65 years                               | 5 (50%)                    | 4 (57%)                   | 1.00           |
| Male sex                                    | 7 (70%)                    | 4 (57%)                   | 0.64           |
| Hemoglobin level <11.5 g/dl                 | 8 (80%)                    | 5 (71%)                   | 1.00           |
| Platelet count <100 K/uL                    | 1 (10%)                    | 2 (29%)                   | 0.54           |
| Serum $\beta$ 2-microglobulin $\geq$ 3 mg/L | 4 (40%)                    | 4 (57%)                   | 0.64           |
| Serum IgM level $\geq$ 4,000 mg/dl          | 7 (70%)                    | 5 (71%)                   | 1.00           |
| Serum IgM level $\geq$ 7,000 mg/dl          | 3 (30%)                    | 3 (43%)                   | 0.78           |
| Bone marrow involvement $\geq$ 60%          | 7 (70%)                    | 3 (43%)                   | 0.35           |
| Adenopathy $\geq$ 1.5 cm                    | 6 (60%)                    | 3 (43%)                   | 0.56           |
| Splenomegaly $\geq$ 15 cm                   | 2 (20%)                    | 0 (0%)                    | 0.49           |
| Acquired von Willebrand disease             | 4 (40%)                    | 3 (43%)                   | 1.00           |
| Cryoglobulinemia                            | 1 (10%)                    | 0 (0%)                    | 1.00           |
| Low IPSSWM score                            | 4 (40%)                    | 2 (29%)                   | 0.83           |
| Intermediate IPSSWM score                   | 2 (20%)                    | 1 (14%)                   |                |
| High IPSSWM score                           | 4 (40%)                    | 4 (57%)                   |                |
| $\geq$ 12 months from WM diagnosis          | 6 (60%)                    | 3 (43%)                   | 0.57           |

NS: nonsense; FS: frameshift; IPSSWM: International Prognostic Scoring System for Waldenström Macroglobulinemia

**Table S2.** Univariate and multivariate logistic regression analysis for VGPR attainment

| Variable                                    | Univariate       |         | Multivariate     |         |
|---------------------------------------------|------------------|---------|------------------|---------|
|                                             | OR (95% CI)      | p-value | OR (95% CI)      | p-value |
| Age >65 years                               | 1.38 (0.42-4.53) | 0.60    |                  |         |
| Male sex                                    | 1.15 (0.33-4.05) | 0.83    |                  |         |
| Hemoglobin level <11.5 g/dl                 | 1.67 (0.42-6.64) | 0.47    |                  |         |
| Platelet count <100 K/uL                    | UTC*             |         |                  |         |
| Serum $\beta$ 2-microglobulin $\geq$ 3 mg/L | 10.8 (2.05-57.1) | 0.005   | 7.61 (1.34-42.9) | 0.02    |
| Serum IgM level $\geq$ 4,000 mg/dl          | 2.17 (0.63-7.45) | 0.22    |                  |         |
| Serum IgM level $\geq$ 7,000 mg/dl          | 1.44 (0.26-8.05) | 0.68    |                  |         |
| Bone marrow involvement $\geq$ 60%          | 1.47 (0.44-4.93) | 0.53    |                  |         |
| Adenopathy $\geq$ 1.5 cm                    | 4.48 (1.23-16.3) | 0.02    | 2.90 (0.68-12.3) | 0.15    |
| Splenomegaly $\geq$ 15 cm                   | 2.45 (0.64-9.44) | 0.19    |                  |         |
| CXCR4 mutation                              | 0.42 (0.12-1.50) | 0.18    |                  |         |
| Low IPSSWM score                            | Ref.             |         |                  |         |
| Intermediate IPSSWM score                   | 2.72 (0.43-17.4) | 0.29    |                  |         |
| High IPSSWM score                           | 3.89 (0.64-23.8) | 0.14    |                  |         |
| $\geq$ 12 months from WM diagnosis          | 1.70 (0.51-5.70) | 0.39    |                  |         |

OR: odds ratio; CI: confidence interval; UTC: unable to calculate; IPSSWM: International Prognostic Scoring System for Waldenström Macroglobulinemia

\*None of the participants who had platelet count <100 K/uL at baseline attained a VGPR.

**Table S3.** Univariate and multivariate Cox proportional-hazard regression analysis for time to VGPR

| Variable                                    | Univariate       |         | Multivariate     |         |
|---------------------------------------------|------------------|---------|------------------|---------|
|                                             | HR (95% CI)      | p-value | HR (95% CI)      | p-value |
| Age >65 years                               | 1.39 (0.56-3.46) | 0.48    |                  |         |
| Male sex                                    | 1.21 (0.46-3.18) | 0.70    |                  |         |
| Hemoglobin level <11.5 g/dl                 | 1.67 (0.48-4.41) | 0.50    |                  |         |
| Platelet count <100 K/uL                    | UTC*             |         |                  |         |
| Serum $\beta$ 2-microglobulin $\geq$ 3 mg/L | 8.15 (1.83-36.3) | 0.006   | 6.08 (1.28-28.8) | 0.02    |
| Serum IgM level $\geq$ 4,000 mg/dl          | 1.58 (0.60-4.17) | 0.36    |                  |         |
| Serum IgM level $\geq$ 7,000 mg/dl          | 1.13 (0.33-3.88) | 0.85    |                  |         |
| Bone marrow involvement $\geq$ 60%          | 1.44 (0.56-3.65) | 0.48    |                  |         |
| Adenopathy $\geq$ 1.5 cm                    | 3.20 (1.15-8.91) | 0.03    | 1.94 (0.67-5.67) | 0.22    |
| Splenomegaly $\geq$ 15 cm                   | 2.01 (0.78-5.16) | 0.15    |                  |         |
| CXCR4 mutation                              | 0.53 (0.19-1.48) | 0.23    |                  |         |
| Low IPSSWM score                            | Ref.             |         |                  |         |
| Intermediate IPSSWM score                   | 2.26 (0.47-10.9) | 0.31    |                  |         |
| High IPSSWM score                           | 3.18 (0.69-14.7) | 0.14    |                  |         |
| $\geq$ 12 months from WM diagnosis          | 1.38 (0.56-3.40) | 0.49    |                  |         |

HR: hazard ratio; CI: confidence interval; UTC: unable to calculate; IPSSWM: International Prognostic Scoring System for Waldenström Macroglobulinemia

\*None of the participants who had platelet count <100 K/uL at baseline attained a VGPR.

**Table S4.** Univariate Cox proportional-hazard regression analysis for PFS

| Variable                                    | Univariate       |         |
|---------------------------------------------|------------------|---------|
|                                             | HR (95% CI)      | p-value |
| Age >65 years                               | 2.32 (0.46-11.8) | 0.31    |
| Male sex                                    | 1.37 (0.27-6.90) | 0.70    |
| Hemoglobin level <11.5 g/dl                 | 1.26 (0.25-6.32) | 0.78    |
| Platelet count <100 K/uL                    | 4.92 (0.95-25.4) | 0.06    |
| Serum $\beta$ 2-microglobulin $\geq$ 3 mg/L | 1.89 (0.38-9.37) | 0.44    |
| Serum IgM level $\geq$ 4,000 mg/dl          | 0.65 (0.16-2.16) | 0.54    |
| Serum IgM level $\geq$ 7,000 mg/dl          | 1.80 (0.35-9.19) | 0.48    |
| Bone marrow involvement $\geq$ 60%          | 2.74 (0.54-14.1) | 0.23    |
| Adenopathy $\geq$ 1.5 cm                    | 2.59 (0.52-13.0) | 0.25    |
| Splenomegaly $\geq$ 15 cm                   | 0.91 (0.18-4.57) | 0.91    |
| CXCR4 mutation                              | 1.00 (0.24-4.22) | 0.99    |
| Low IPSSWM score                            | Ref.             |         |
| Intermediate IPSSWM score                   | UTC*             |         |
| High IPSSWM score                           | 2.65 (0.31-22.7) | 0.38    |
| $\geq$ 12 months from WM diagnosis          | 0.64 (0.15-2.81) | 0.56    |

HR: hazard ratio; CI: confidence interval; UTC: unable to calculate; IPSSWM: International Prognostic Scoring System for Waldenström Macroglobulinemia

\*None of the participants with intermediate IPSSWM score has progressed.
